# Supplementary material for: Association between Mother’s Education and Infant and Young Child Feeding Practices in South Asia
Source: MDPI journal article supplement (doi:10.3390/nu14071514), 2022-04-05
Supplement: s1 [file s1]

**Table S1:** Socio-demographic characteristics of the study participants

| Characteristics             | All countries<br>(2015-2018) | Afghanistan<br>(2015 <sup>y</sup> ) | Bangladesh<br>(2017-2018 <sup>y</sup> ) | India<br>(2015-2016 <sup>y</sup> ) | Maldives<br>(2016-2017 <sup>y</sup> ) | Nepal<br>(2016 <sup>y</sup> ) | Pakistan<br>(2017-2018 <sup>y</sup> ) |
|-----------------------------|------------------------------|-------------------------------------|-----------------------------------------|------------------------------------|---------------------------------------|-------------------------------|---------------------------------------|
|                             | n (%)<br>n=120830            | n (%)<br>n=11762                    | n (%)<br>n=3411                         | n (%)<br>n=97935                   | n (%)<br>n=1147                       | n (%)<br>n=1919               | n (%)<br>n=4656                       |
| <b>Mother's age</b>         |                              |                                     |                                         |                                    |                                       |                               |                                       |
| 15-24 years                 | 52217 (45.6)                 | 4293 (37.6)                         | 1883 (55.1)                             | 43310 (47.0)                       | 258 (20.1)                            | 1034 (52.6)                   | 1439 (31.6)                           |
| 25-34 years                 | 58794 (47.3)                 | 5454 (44.8)                         | 1328 (39.3)                             | 48028 (47.5)                       | 704 (61.9)                            | 786 (42.2)                    | 2494 (54.5)                           |
| ≥35 years                   | 9819 (7.1)                   | 2015 (17.7)                         | 200 (5.6)                               | 6597 (6.7)                         | 185 (18.1)                            | 99 (5.2)                      | 723 (13.9)                            |
| <b>Mother's education</b>   |                              |                                     |                                         |                                    |                                       |                               |                                       |
| <Secondary                  | 57216 (46.1)                 | 10751 (89.3)                        | 1174 (34.0)                             | 41308 (40.8)                       | 190 (16.4)                            | 900 (48.7)                    | 2893 (63.1)                           |
| ≥Secondary                  | 63614 (53.9)                 | 1011 (10.7)                         | 2237 (66.0)                             | 56627 (59.2)                       | 957 (83.6)                            | 1019 (51.3)                   | 1763 (36.9)                           |
| <b>Child sex</b>            |                              |                                     |                                         |                                    |                                       |                               |                                       |
| Male                        | 63146 (52.3)                 | 6111 (52.0)                         | 1769 (52.0)                             | 51299 (52.5)                       | 574 (59.6)                            | 1038 (53.8)                   | 2355 (50.3)                           |
| Female                      | 57684 (47.7)                 | 5651 (48.0)                         | 1642 (48.0)                             | 46636 (47.5)                       | 573 (50.4)                            | 881 (46.2)                    | 2301 (49.7)                           |
| <b>Child age, mean (sd)</b> | 11.32 (6.6)                  | 10.6 (6.6)                          | 11.2 (6.9)                              | 11.4 (6.6)                         | 11.7 (6.8)                            | 11.8 (6.8)                    | 10.8 (6.6)                            |
| <b>Place of residence</b>   |                              |                                     |                                         |                                    |                                       |                               |                                       |
| Urban                       | 30159 (27.8)                 | 2920 (24.2)                         | 1167 (26.7)                             | 22790 (27.5)                       | 114 (9.9)                             | 1089 (53.6)                   | 2079 (33.1)                           |
| Rural                       | 90671 (72.2)                 | 8842 (75.8)                         | 2244 (73.3)                             | 75145 (72.6)                       | 1033 (90.1)                           | 830 (46.5)                    | 2577 (67.0)                           |
| <b>Wealth Index</b>         |                              |                                     |                                         |                                    |                                       |                               |                                       |
| Poorest                     | 29792 (23.7)                 | 2019 (17.8)                         | 724 (20.5)                              | 25225 (24.8)                       | 311 (27.1)                            | 486 (21.0)                    | 1027 (21.5)                           |
| Poorer                      | 28187 (21.7)                 | 2667 (20.0)                         | 712 (21)                                | 23044 (22.0)                       | 327 (28.5)                            | 407 (21.2)                    | 1030 (19.1)                           |
| Middle                      | 24750 (20.4)                 | 2676 (21.5)                         | 627 (19.2)                              | 19765 (20.2)                       | 328 (28.6)                            | 413 (23.0)                    | 941 (21.5)                            |
| Richer                      | 20959 (18.6)                 | 2654 (21.5)                         | 684 (20.5)                              | 16336 (18.1)                       | 120 (10.5)                            | 371 (20.5)                    | 794 (18.6)                            |
| Richest                     | 17142 (15.6)                 | 1746 (19.3)                         | 664 (18.8)                              | 13565 (14.8)                       | 61 (5.3)                              | 242 (14.4)                    | 864 (19.3)                            |

<sup>y</sup>Survey year**Table S2:** Prevalence of IYCF practices among South Asian countries

| IYCF Indicators                                | Pooled data              | Afghanistan            | Bangladesh            | India                   | Maldives             | Nepal                 | Pakistan              |
|------------------------------------------------|--------------------------|------------------------|-----------------------|-------------------------|----------------------|-----------------------|-----------------------|
|                                                | % (n)                    | % (n)                  | % (n)                 | % (n)                   | % (n)                | % (n)                 | % (n)                 |
| Early initiation of breastfeeding              | 52548 (45.4)<br>N=115776 | 5620 (42.1)<br>N=11433 | 2038 (60.4)<br>N=3369 | 41711 (43.4)<br>N=93514 | 798 (68.2)<br>N=1121 | 1102 (55.6)<br>N=1900 | 1279 (20.8)<br>N=4439 |
| Exclusive Breastfeeding under 6 months         | 16068 (53.9)<br>N=29838  | 1659 (41.9)<br>N=3331  | 605 (64.7)<br>N=937   | 12662 (52.9)<br>N=23547 | 170 (63.3)<br>N=276  | 311 (66.5)<br>N=452   | 661 (45.7)<br>N=1295  |
| Continued Breastfeeding at 1 year              | 17772 (82.8)<br>N=21470  | 1983 (75.8)<br>N=2578  | 536 (92.7)<br>N=575   | 14127 (83.2)<br>N=16198 | 174 (76.0)<br>N=206  | 336 (94.7)<br>N=354   | 616 (67.2)<br>N=859   |
| Introduction of Solid-semi-solid or soft foods | 8415 (50.2)<br>N=16778   | 921 (58.2)<br>N=1646   | 287 (69.0)<br>N=401   | 6158 (44.1)<br>N=13706  | 111 (81.6)<br>N=132  | 175 (78.5)<br>N=228   | 379 (56.3)<br>N=665   |
| Minimum dietary diversity                      | 19918 (21.9)<br>N=90845  | 1673 (23.1)<br>N=8373  | 940 (37.7)<br>N=2472  | 15361 (20.7)<br>N=74304 | 617 (71.4)<br>N=869  | 671 (44.7)<br>N=1467  | 656 (18.5)<br>N=3360  |
| Minimum meal frequency                         | 36281 (39.9)<br>N=90281  | 4185 (49.1)<br>N=8431  | 1901 (79.1)<br>N=2367 | 26640 (34.6)<br>N=74388 | 562 (65.3)<br>N=871  | 973 (70.0)<br>N=1400  | 2020 (57.9)<br>N=3361 |
| Minimum acceptable diet                        | 11622 (12.8)<br>N=90992  | 1227 (16.6)<br>N=8431  | 873 (34.8)<br>N=2474  | 7975 (10.7)<br>N=74388  | 439 (52.1)<br>N=871  | 507 (34.2)<br>N=1467  | 598 (16.5)<br>N=3361  |

|                                                  |                         |                       |                       |                         |                     |                      |                       |
|--------------------------------------------------|-------------------------|-----------------------|-----------------------|-------------------------|---------------------|----------------------|-----------------------|
| Consumption of iron-rich or iron fortified foods | 18705 (21.4)<br>N=87552 | 2202 (30.4)<br>N=8022 | 1642 (68.0)<br>N=2401 | 12583 (17.0)<br>N=71647 | 584 (69.5)<br>N=845 | 489 (34.5)<br>N=1436 | 1205 (37.0)<br>N=3201 |
|--------------------------------------------------|-------------------------|-----------------------|-----------------------|-------------------------|---------------------|----------------------|-----------------------|

n= numerators, N= Denominators of the respective indicators

**Table S3:** Bivariate association of IYCF indicators and mother's education

| Indicators | Pooled  |      | Afghanistan |      | Bangladesh |      | India   |      | Maldives |      | Nepal   |      | Pakistan |      |
|------------|---------|------|-------------|------|------------|------|---------|------|----------|------|---------|------|----------|------|
|            | <Sec    | ≥Sec | <Sec        | ≥Sec | <Sec       | ≥Sec | <Sec    | ≥Sec | <Sec     | ≥Sec | <Sec    | ≥Sec | <Sec     | ≥Sec |
| EIBF (%)   | 43.6    | 47.0 | 41.9        | 43.7 | 65.2       | 57.9 | 39.7    | 46.0 | 71.8     | 67.5 | 53.1    | 58.0 | 22.1     | 18.5 |
|            | P<0.001 |      | P=0.630     |      | P<0.001    |      | P<0.001 |      | P=0.367  |      | P=0.129 |      | P=0.110  |      |
| EBF (%)    | 52      | 55.5 | 42.7        | 35.0 | 63.3       | 65.4 | 51.2    | 54.0 | 54.8     | 65.1 | 68.2    | 65.1 | 50.3     | 37.3 |
|            | P<0.001 |      | P=0.155     |      | P=0.570    |      | P=0.003 |      | P=0.306  |      | P=0.544 |      | P=0.002  |      |
| CBF (%)    | 82.9    | 82.7 | 75.2        | 80.6 | 91.4       | 93.4 | 84.9    | 82.0 | 85.6     | 74.0 | 92.5    | 96.8 | 71.8     | 59.8 |
|            | P=0.598 |      | P=0.279     |      | P=0.383    |      | P<0.001 |      | P=0.390  |      | P=0.123 |      | P=0.027  |      |
| ISSSF (%)  | 46.3    | 53.7 | 58.4        | 56.5 | 60.7       | 67.9 | 38.0    | 48.3 | 71.6     | 83.4 | 75.1    | 80.2 | 48.0     | 71.0 |
|            | P<0.001 |      | P=0.818     |      | P=0.238    |      | P<0.001 |      | P=0.201  |      | P=0.398 |      | P<0.001  |      |
| MDD (%)    | 17.3    | 26.1 | 21.9        | 33.1 | 27.3       | 42.8 | 15.6    | 24.3 | 59.8     | 73.6 | 35.3    | 54.0 | 12.1     | 29.2 |
|            | P<0.001 |      | P=0.029     |      | P<0.001    |      | P<0.001 |      | P=0.017  |      | P<0.001 |      | P<0.001  |      |
| MMF (%)    | 38.2    | 41.5 | 49.0        | 49.1 | 76.8       | 80.2 | 31.5    | 36.8 | 54.3     | 67.4 | 65.1    | 74.9 | 52.4     | 67.0 |
|            | P<0.001 |      | P=0.054     |      | P=0.102    |      | P<0.001 |      | P=0.022  |      | P<0.001 |      | P<0.001  |      |
| MAD (%)    | 10.0    | 15.3 | 15.7        | 23.5 | 25.0       | 39.6 | 7.8     | 12.7 | 39.5     | 54.4 | 25.6    | 42.7 | 10.9     | 25.9 |
|            | P<0.001 |      | P=0.054     |      | P<0.001    |      | P<0.001 |      | P=0.009  |      | P<0.001 |      | P<0.001  |      |
| CIRF (%)   | 19.1    | 23.4 | 29.5        | 37.4 | 59.1       | 69.5 | 14.1    | 19.0 | 69.0     | 69.6 | 29.2    | 39.7 | 29.5     | 49.2 |
|            | P<0.001 |      | P=0.060     |      | P<0.001    |      | P<0.001 |      | P=0.910  |      | P<0.001 |      | P<0.001  |      |

Sec=secondary; P-values were generated from adjusted Wald test. EIBF= Early initiation of breastfeeding, EBF= Exclusive breastfeeding, CBF= Continued breastfeeding at 1 year, ISSSF=Introduction of solid semi-solid and soft foods, MDD= Minimum dietary diversity, MMF=Minimum meal frequency, MAD= Minimum acceptable diet, CIRF=Consumption of iron-rich or iron-fortified foods.

**Table S4:** Sensitivity analysis of the association of IYCF and maternal education (years of schooling)

| IYCF Indicators | All countries (Pooled data) |         | Afghanistan       |         | Bangladesh        |         | India                |         | Maldives          |         | Nepal             |         | Pakistan          |         |
|-----------------|-----------------------------|---------|-------------------|---------|-------------------|---------|----------------------|---------|-------------------|---------|-------------------|---------|-------------------|---------|
|                 | AOR (95% CI)                | p-value | AOR (95% CI)      | p-value | AOR (95% CI)      | p-value | AOR (95% CI)         | p-value | AOR (95% CI)      | p-value | AOR (95% CI)      | p-value | AOR (95% CI)      | p-value |
| <b>EIBF</b>     |                             |         |                   |         |                   |         |                      |         |                   |         |                   |         |                   |         |
| <Secondary      | Ref.                        |         | Ref.              |         | Ref.              |         | Ref.                 |         | Ref.              |         | Ref.              |         | Ref.              |         |
| ≥Secondary      | 1.01 (1.005, 1.011)         | <0.001  | 1.01 (1.00, 1.02) | 0.134   | 0.97 (0.95, 0.99) | 0.042   | 1.009 (1.005, 1.012) | <0.001  | 0.96 (0.91, 1.01) | 0.133   | 1.02 (0.99, 1.04) | 0.261   | 0.99 (0.97, 1.01) | 0.176   |
| <b>EBF</b>      |                             |         |                   |         |                   |         |                      |         |                   |         |                   |         |                   |         |
| <Secondary      | Ref.                        |         | Ref.              |         | Ref.              |         | Ref.                 |         | Ref.              |         | Ref.              |         | Ref.              |         |
| ≥Secondary      | 1.02 (1.01, 1.24)           | <0.001  | 0.98 (0.96, 1.01) | 0.138   | 1.02 (0.98, 1.07) | 0.367   | 1.03 (1.02, 1.032)   | <0.001  | 1.06 (0.97, 1.17) | 0.213   | 1.02 (0.96, 1.08) | 0.494   | 0.95 (0.92, 0.98) | <0.001  |
| <b>CBF</b>      |                             |         |                   |         |                   |         |                      |         |                   |         |                   |         |                   |         |
| <Secondary      | Ref.                        |         | Ref.              |         | Ref.              |         | Ref.                 |         | Ref.              |         | Ref.              |         | Ref.              |         |
| ≥Secondary      | 1.04 (0.96, 1.14)           | 0.328   | 1.02 (0.98, 1.05) | 0.387   | 1.06 (0.95, 1.18) | 0.291   | 1.003 (0.993, 1.01)  | 0.622   | 1.00 (0.87, 1.15) | 0.587   | 1.10 (0.97, 1.25) | 0.144   | 0.99 (0.96, 1.03) | 0.579   |
| <b>ISSSF</b>    |                             |         |                   |         |                   |         |                      |         |                   |         |                   |         |                   |         |
| <Secondary      | Ref.                        |         | Ref.              |         | Ref.              |         | Ref.                 |         | Ref.              |         | Ref.              |         | Ref.              |         |
| ≥Secondary      | 1.04 (1.03, 1.05)           | <0.001  | 0.99 (0.95, 1.02) | 0.391   | 1.00 (0.93, 1.07) | 0.899   | 1.04 (1.03, 1.05)    | <0.001  | 1.08 (0.89, 1.31) | 0.454   | 1.09 (1.00, 1.20) | 0.057   | 1.06 (1.01, 1.10) | 0.012   |
| <b>MDD</b>      |                             |         |                   |         |                   |         |                      |         |                   |         |                   |         |                   |         |
| <Secondary      | Ref.                        |         | Ref.              |         | Ref.              |         | Ref.                 |         | Ref.              |         | Ref.              |         | Ref.              |         |
| ≥Secondary      | 1.04 (1.03, 1.42)           | <0.001  | 1.03 (1.02, 1.05) | <0.001  | 1.11 (1.08, 1.14) | <0.001  | 1.04 (1.03, 1.04)    | <0.001  | 1.07 (1.01, 1.15) | 0.030   | 1.13 (1.09, 1.17) | <0.001  | 1.05 (1.02, 1.07) | <0.001  |
| <b>MMF</b>      |                             |         |                   |         |                   |         |                      |         |                   |         |                   |         |                   |         |
| <Secondary      | Ref.                        |         | Ref.              |         | Ref.              |         | Ref.                 |         | Ref.              |         | Ref.              |         | Ref.              |         |
| ≥Secondary      | 1.02 (1.016, 1.23)          | <0.001  | 1.01 (1.00, 1.02) | 0.157   | 1.05 (1.02, 1.09) | 0.002   | 1.02 (1.01, 1.22)    | <0.001  | 1.08 (1.02, 1.15) | 0.008   | 1.06 (1.03, 1.10) | <0.001  | 1.03 (1.01, 1.04) | 0.010   |
| <b>MAD</b>      |                             |         |                   |         |                   |         |                      |         |                   |         |                   |         |                   |         |
| <Secondary      | Ref.                        |         | Ref.              |         | Ref.              |         | Ref.                 |         | Ref.              |         | Ref.              |         | Ref.              |         |
| ≥Secondary      | 1.042 (1.037, 1.047)        | <0.001  | 1.04 (1.02, 1.06) | <0.001  | 1.11 (1.09, 1.14) | <0.001  | 1.04 (1.03, 1.05)    | <0.001  | 1.12 (1.05, 1.19) | <0.001  | 1.13 (1.09, 1.17) | <0.001  | 1.04 (1.02, 1.06) | <0.001  |
| <b>CIRF</b>     |                             |         |                   |         |                   |         |                      |         |                   |         |                   |         |                   |         |
| <Secondary      | Ref.                        |         | Ref.              |         | Ref.              |         | Ref.                 |         | Ref.              |         | Ref.              |         | Ref.              |         |
| ≥Secondary      | 1.03 (1.02, 1.04)           | <0.001  | 1.02 (1.01, 1.04) | 0.004   | 1.09 (1.06, 1.12) | <0.001  | 1.021 (1.016, 1.025) | <0.001  | 1.03 (0.97, 1.11) | 0.306   | 1.05 (1.02, 1.09) | 0.001   | 1.04 (1.02, 1.06) | <0.001  |

AOR=Adjusted odds ratio; CI=confidence intervals; Adjusted odds ratios, 95% confidence intervals, and p-values were obtained from the log-binomial regression model using the generalized estimating equation. Models adjusted for child's age, child's sex, maternal age, place of residence, and wealth index. For pooled data, besides these factors, we adjust the model by survey year. EIBF=Early initiation of breastfeeding, EBF= Exclusive breastfeeding, CBF=Continued breastfeeding at 1 year, ISSSF=Introduction of solid semi-solid and soft foods, MDD=Minimum dietary diversity, MMF=Minimum meal frequency, MAD=Minimum acceptable diet, CIRF=Consumption of iron-rich or iron-fortified foods.
